# Supplementary material for: Tunable Thin Film Periodicities by Controlling the Orientation of Cylindrical Domains in Side Chain Liquid Crystalline Block Copolymers
Source: Hindawi journal article supplement (doi:10.1155/2022/8286518), 2022-09-09
Supplement: f1 [file 8286518.f1.docx]

**SUPPLEMENTARY INFORMATION**

**Tunable Thin Film Periodicities by Controlling the Orientation of Cylindrical Domains in Side-Chain Liquid Crystalline Block Copolymers**

*Lei Dong1*, Alvin Chandra2, Kevin Wylie2,Yuta Nabae2, Teruaki Hayakawa2*

1School of Materials Science and Engineering, Southeast University, Nanjing 211189, China

2Department of Materials Science and Engineering, School of Materials and Chemical Technology, Tokyo Institute of Technology, Ookayama, Meguro-ku, Tokyo, 152-8552, Japan

**Corresponding Author**

Lei Dong (leidong@seu.edu.cn)


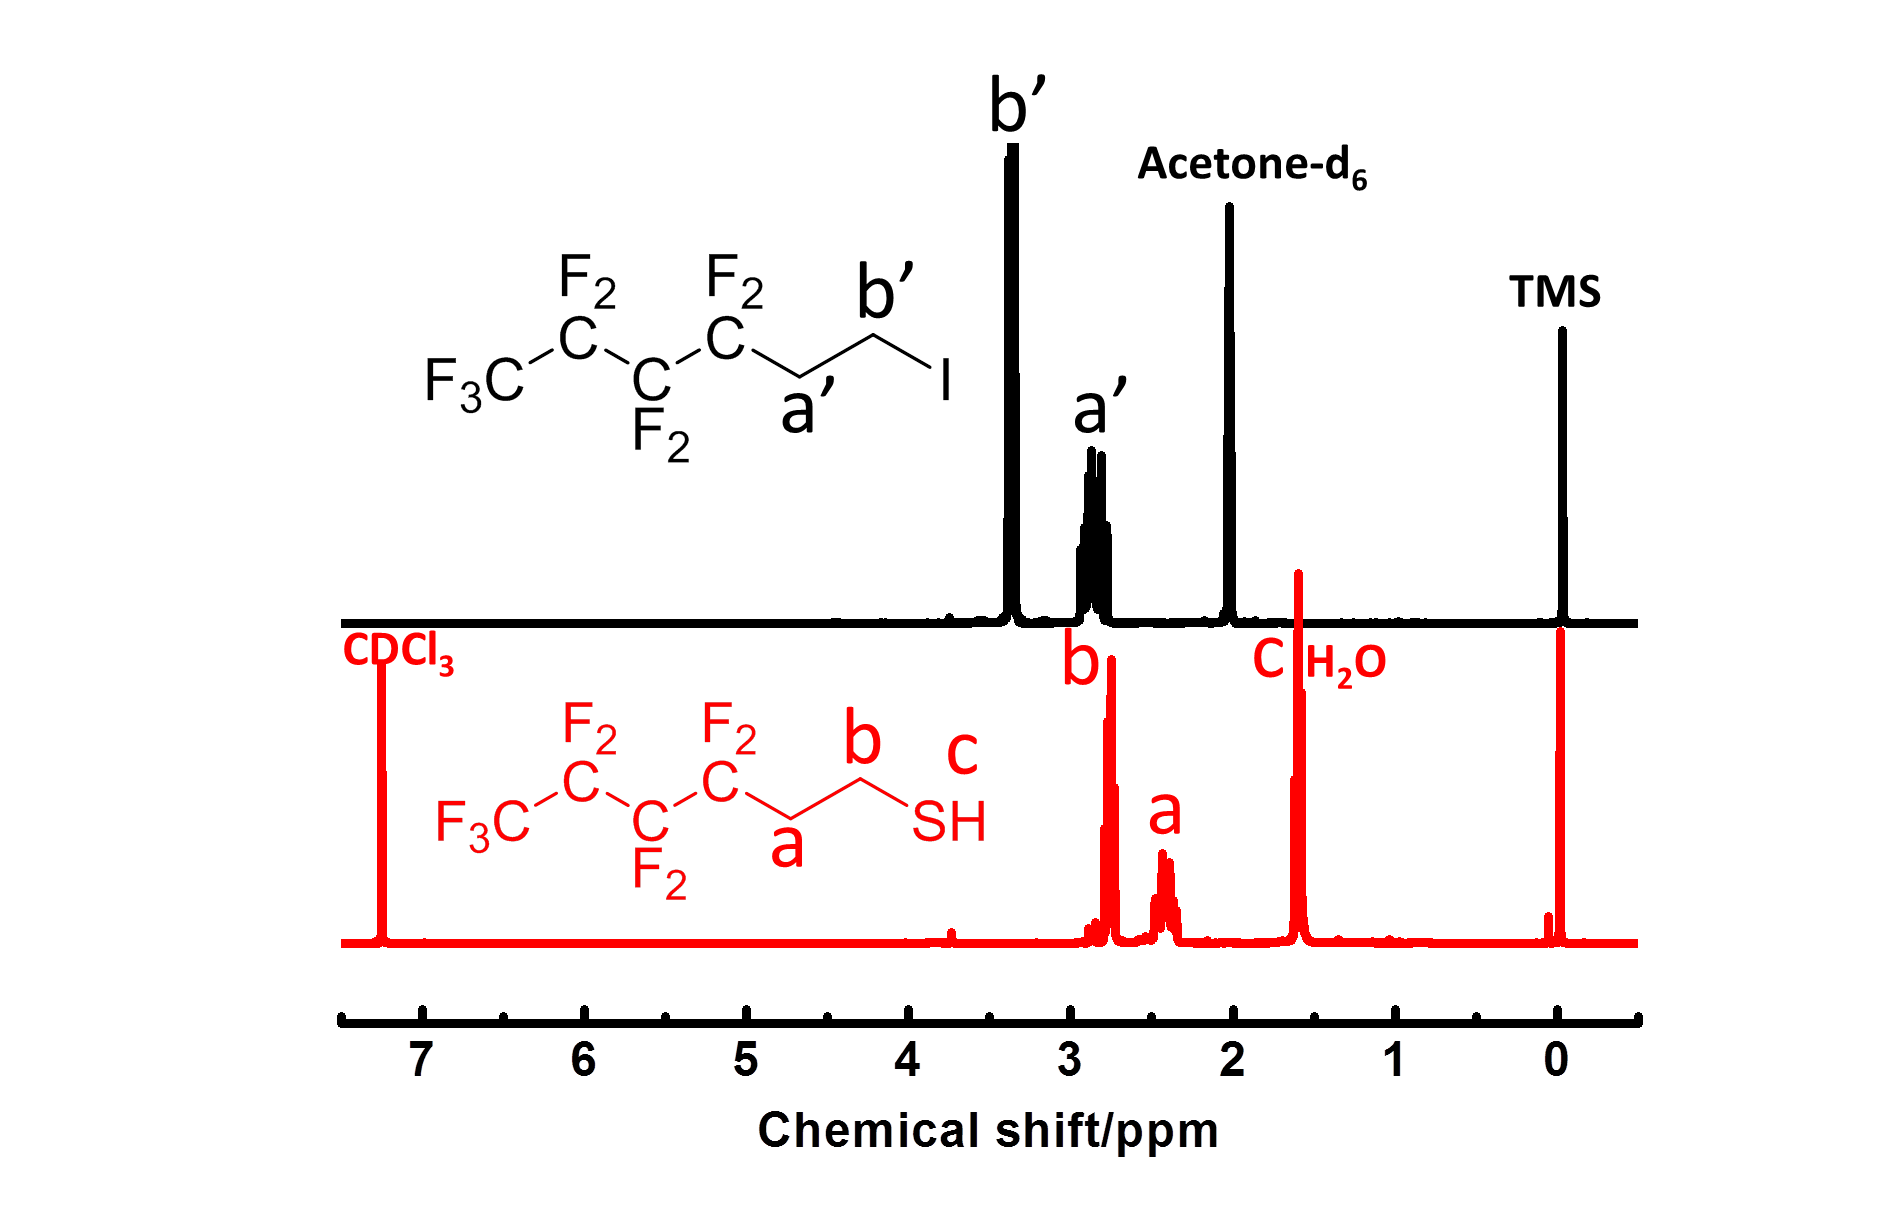


**Figure S1**. 1H NMR spectra of 1,1,1,2,2,3,3,4,4-nonafluoro-6-iodohexane (black) in acetone-*d*6 and the synthesized 3,3,4,4,5,5,6,6,6-nonafluoro-1-hexanethiol (red) in chloroform-*d*.

Synthesis of ,3,4,4,5,5,6,6,6-nonafluoro-1-hexanethiol

A mixture of 1.87 g. (5.0 mmol) of 1,1,1,2,2,3,3,4,4-nonafluoro-6-iodohexane, 0.41 g. (5.5 mmol) of thiourea, and 3 ml ethanol are vigorously stirred and refluxed for 3 hours. Then ethanol is fully evaporated and white solid is obtained. A solution of 0.20 g (5.0 mmol) of sodium hydroxide in 2 ml of water is added, and the mixture is refluxed for another 2 hours under Ar protection. During this period the prepared thiols are continuously separated from aqueous solution and precipitated at the bottom of flask. And the aqueous layer is neutralized with dilute sulfuric acid and then extracted with 5 ml of ethyl ether for twice. The extract is dried over anhydrous sodium sulfate and the residual oil was distilled to yield a colorless liquid (80% yield).

1H NMR (400 MHz, chloroform-*d*, δ, ppm): 1.60 (t, -SH), 2.41 (m, -CF2-CH2-), 2.76 (q, SH-CH2-).

Synthesis of homopolymer

Synthesis of homo-PGMA by living anionic polymerization

The synthesis of PGMA was performed under the same condition for the synthesis of PS-*b*-PGMA, except a higher polymerization temperature at -40 °C. The *Mn* and *Ð* of the product tested by SEC were 1700 g mol-1 and 1.18, respectively.

1H NMR (400 MHz, chloroform-*d*, δ, ppm): 0.87 (s, α-CH3), 1.08 (s, α-CH3), 1.89 (br, backbone, -CH2-C(CH3)-), 2.63 (s, -CH2-CH(CH2)-O-), 2.83 (s, -CH2-CH(CH2)-O-), 3.21 (s, -CH2-CH(CH2)-O-), 3.80 (s, -(C=O)O-CH2-), 4.28 (s, -(C=O)O-CH2-), 7.15-7.20 (m, aromatic, DPE).

Synthesis of homo-PXFMA through the post-functionalization of PGMA

The post-functionalizations of PGMA were also performed under the same condition for the synthesis of PS-*b*-PXFMA. Lower loading of thiols (1.2~1.3 mole equiv. to PGMA repeating units) were added because of the difficulty on purification of excessive thiols in precipitation process. Homo-P8FMA and homo-P6FMA were precipitated in methanol for three times, while homo-P4FMA was precipitated in mixture of methanol and water (*v:v*=1:2) for three times. The product was dried under a reduced pressure at room temperature overnight to yield a white powder (59~33% yield). Homo-P8FMA only reveals the proton signals from the backbone of polymer because of the poor solubility of bulky semi-fluorinated side chain in common organic solvent. The properties of homo-P1FMA were previously reported by our group[[1](#_ENREF_1)].

Characterization of homo-P4FMA. The *Mn*and *Ð* of the product measured by SEC were 4600 g mol-1 and 1.08, respectively. 1H NMR (400 MHz, homo-P4FMA, δ, ppm): 0.96 (s, α-CH3, P4FMA), 1.09 (s, α-CH3, P4FMA), 1.86 (br, backbone, -CH2-C(CH3)-), 2.30-2.50 (t, -CH2-CF2-, P4FMA), 2.60-2.76 (t, -S-CH2-CH2-CF2-, P4FMA), 2.76-2.87 (d, -CH(OH)-CH2-S-, P4FMA), 3.82-4.17 (d, -(C=O)O-CH2-, P4FMA) (m, -CH(OH)-, P4FMA),

7.06-7.30 (m, aromatic, DPE).

Characterization of homo-P6FMA. The *Mn*and *Ð* of the product measured by SEC were 5800 g mol-1 and 1.12, respectively. 1H NMR (400 MHz, homo-P6FMA, δ, ppm): 0.96 (s, α-CH3, P6FMA), 1.09 (s, α-CH3, P6FMA), 1.86 (br, backbone, -CH2-C(CH3)-), 2.30-2.50 (t, -CH2-CF2-, P6FMA), 2.60-2.76 (t, -S-CH2-CH2-CF2-, P6FMA), 2.76-2.87 (d, -CH(OH)-CH2-S-, P6FMA), 3.82-4.17 (d, -(C=O)O-CH2-, P6FMA) (m, -CH(OH)-, P6FMA),

7.06-7.30 (m, aromatic, DPE).

Characterization of homo-P8FMA. The *Mn*and *Ð* of the product measured by SEC were 7 700 g mol-1 and 1.03, respectively. 1H NMR (400 MHz, homo-P8FMA, δ, ppm): 0.87 (s, α-CH3, P8FMA), 1.25 (s, α-CH3, P8FMA), 1.56 (br, backbone, -CH2-C(CH3)-, P8FMA). 7.06-7.27 (m, aromatic, DPE).

**Table S1**. Characteristics of the synthesized homopolymers.

| Homopolymer | *M*n a(kg mol-1) | Estimated *M*n b(kg mol-1) | *Ð* a | *Tg* (°C) c | *Tiso*(°C) c |
| --- | --- | --- | --- | --- | --- |
| homo PGMA | 1700 | - | 1.18 | 68.0d | - |
| homo P1FMAd | 27700d | - | 1.19d | 37.0d | - |
| homo P4FMA | 4600 | 4700 | 1.08 | 60.5 | - |
| homo P6FMA | 5800 | 5700 | 1.12 | 62.7 | 145.8 |
| homo P8FMA | 7700 | 6800 | 1.03 | 116.8 | 78.2 |

a Determined by SEC. b Estimated from *Mn* of homo-PGMA and assumption of 100% conversion in thiol-epoxy reaction. c Determined by DSC. d Referred from our previous paper[[1](#_ENREF_1)].


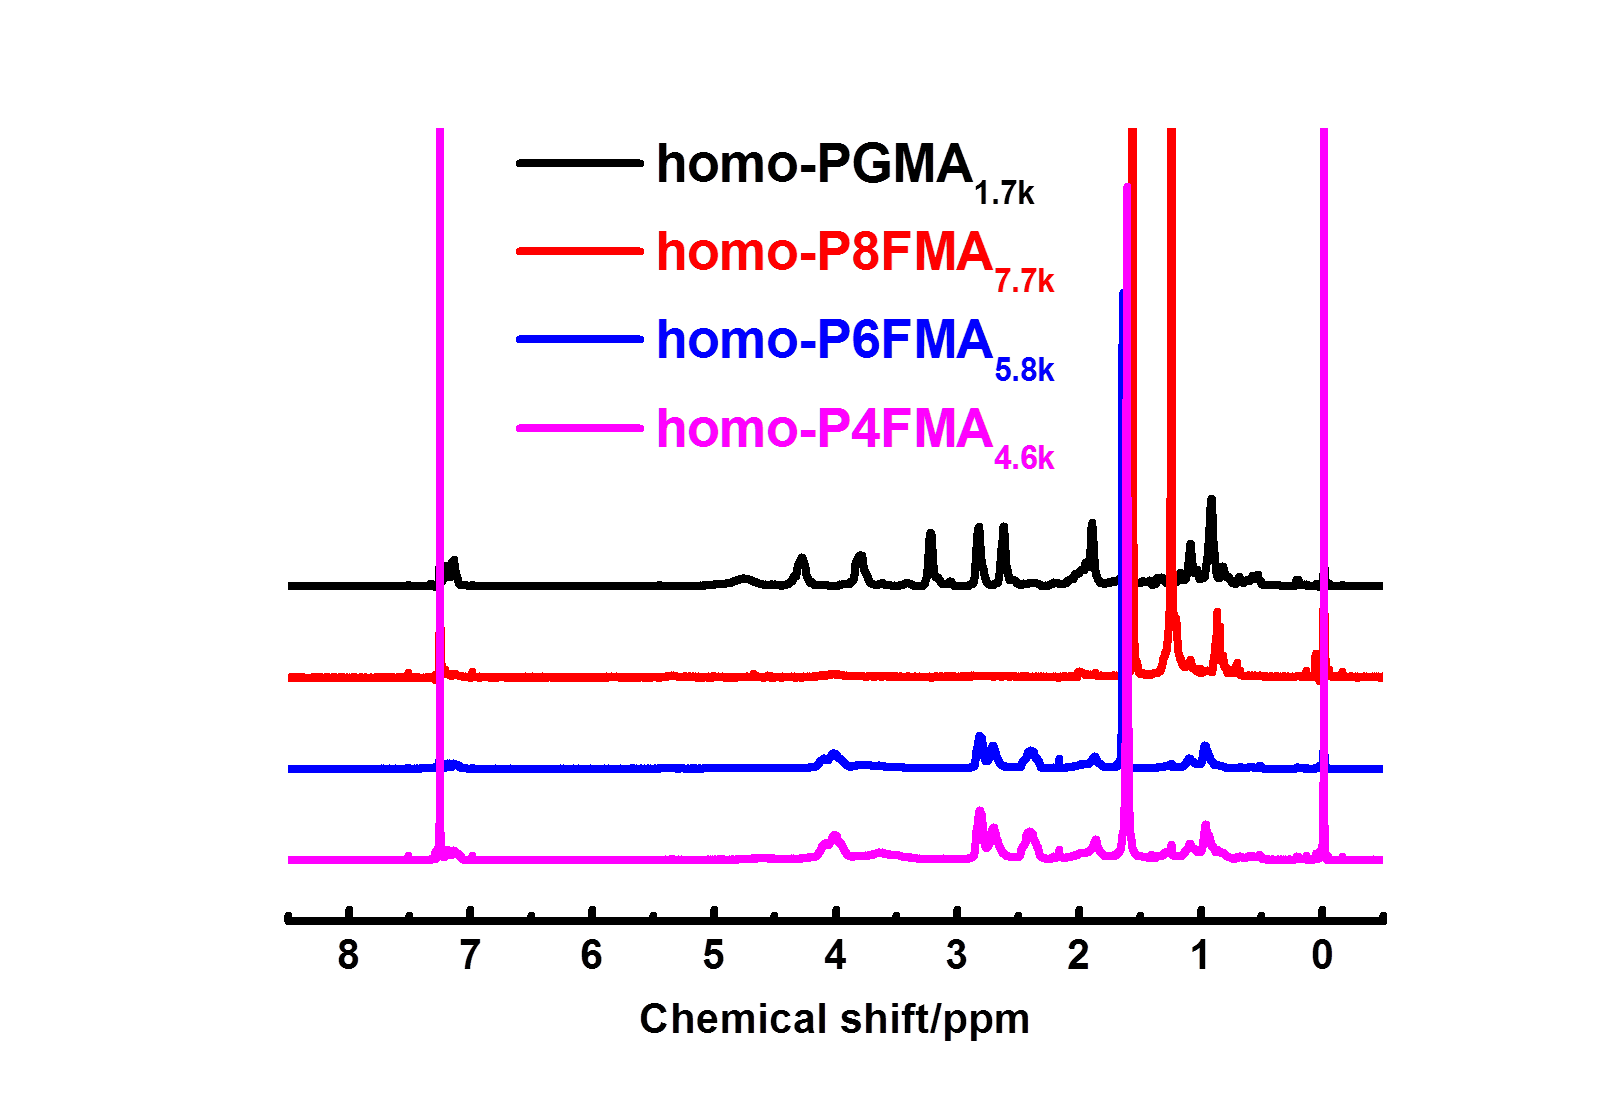


**Figure S2**. 1H NMR spectra of synthesized homo-PGMA and post-functionalized homo-PXFMA (X=4, 6 and 8) in CDCl3 solvent. The below right number indicates the molecular weight of each homo-polymer.


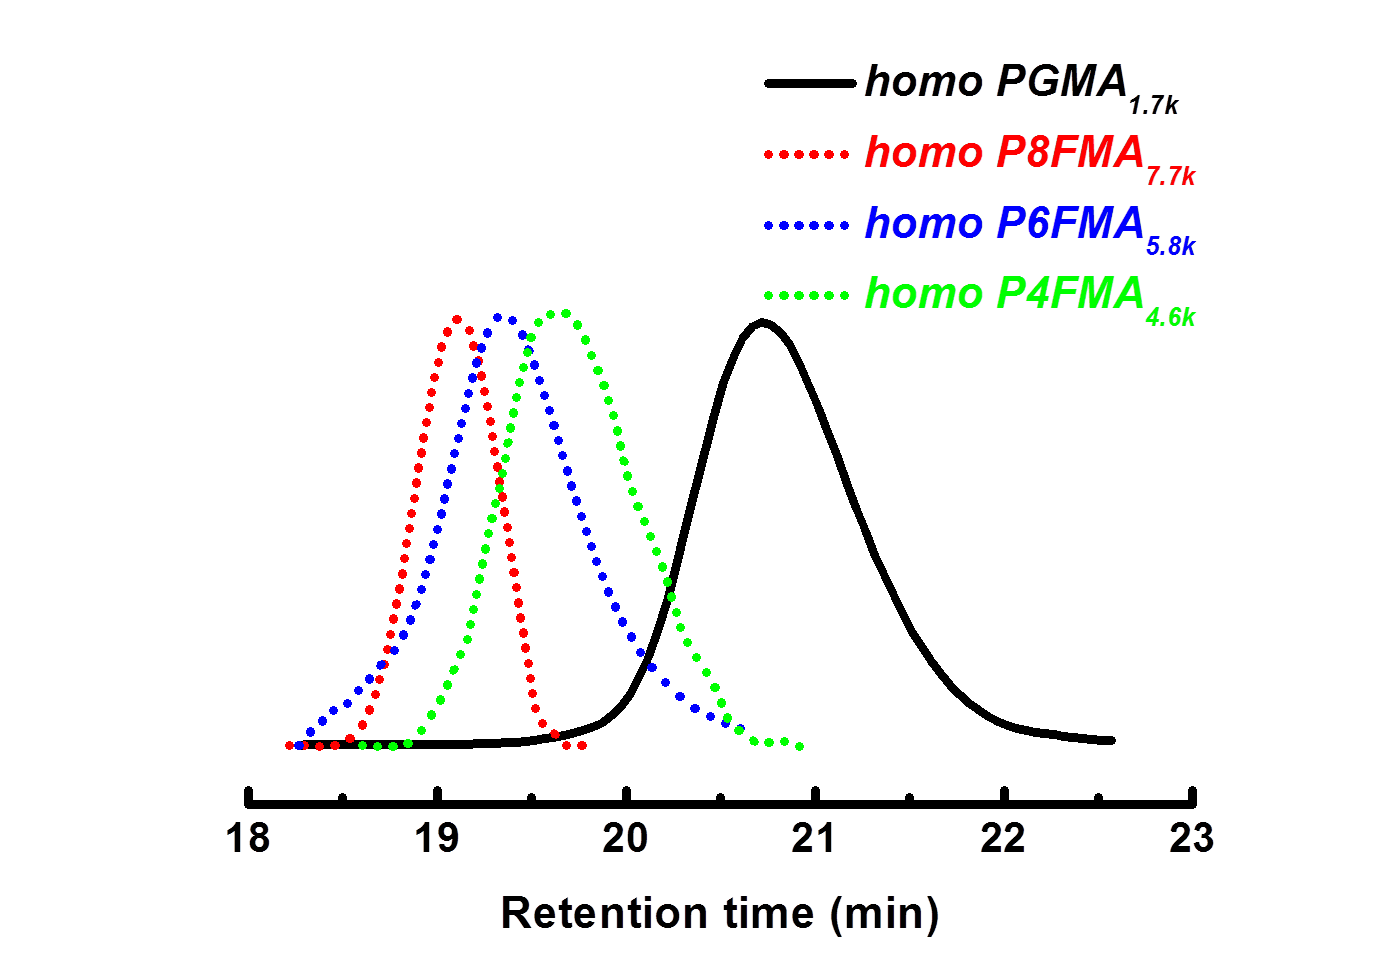


**Figure S3**. SEC chromatograms of the precursor homo-PGMA and post-functionalized homo-PXFMA (X=4, 6 and 8) in THF eluent. The below right number indicates the molecular weight of each homo-polymer.


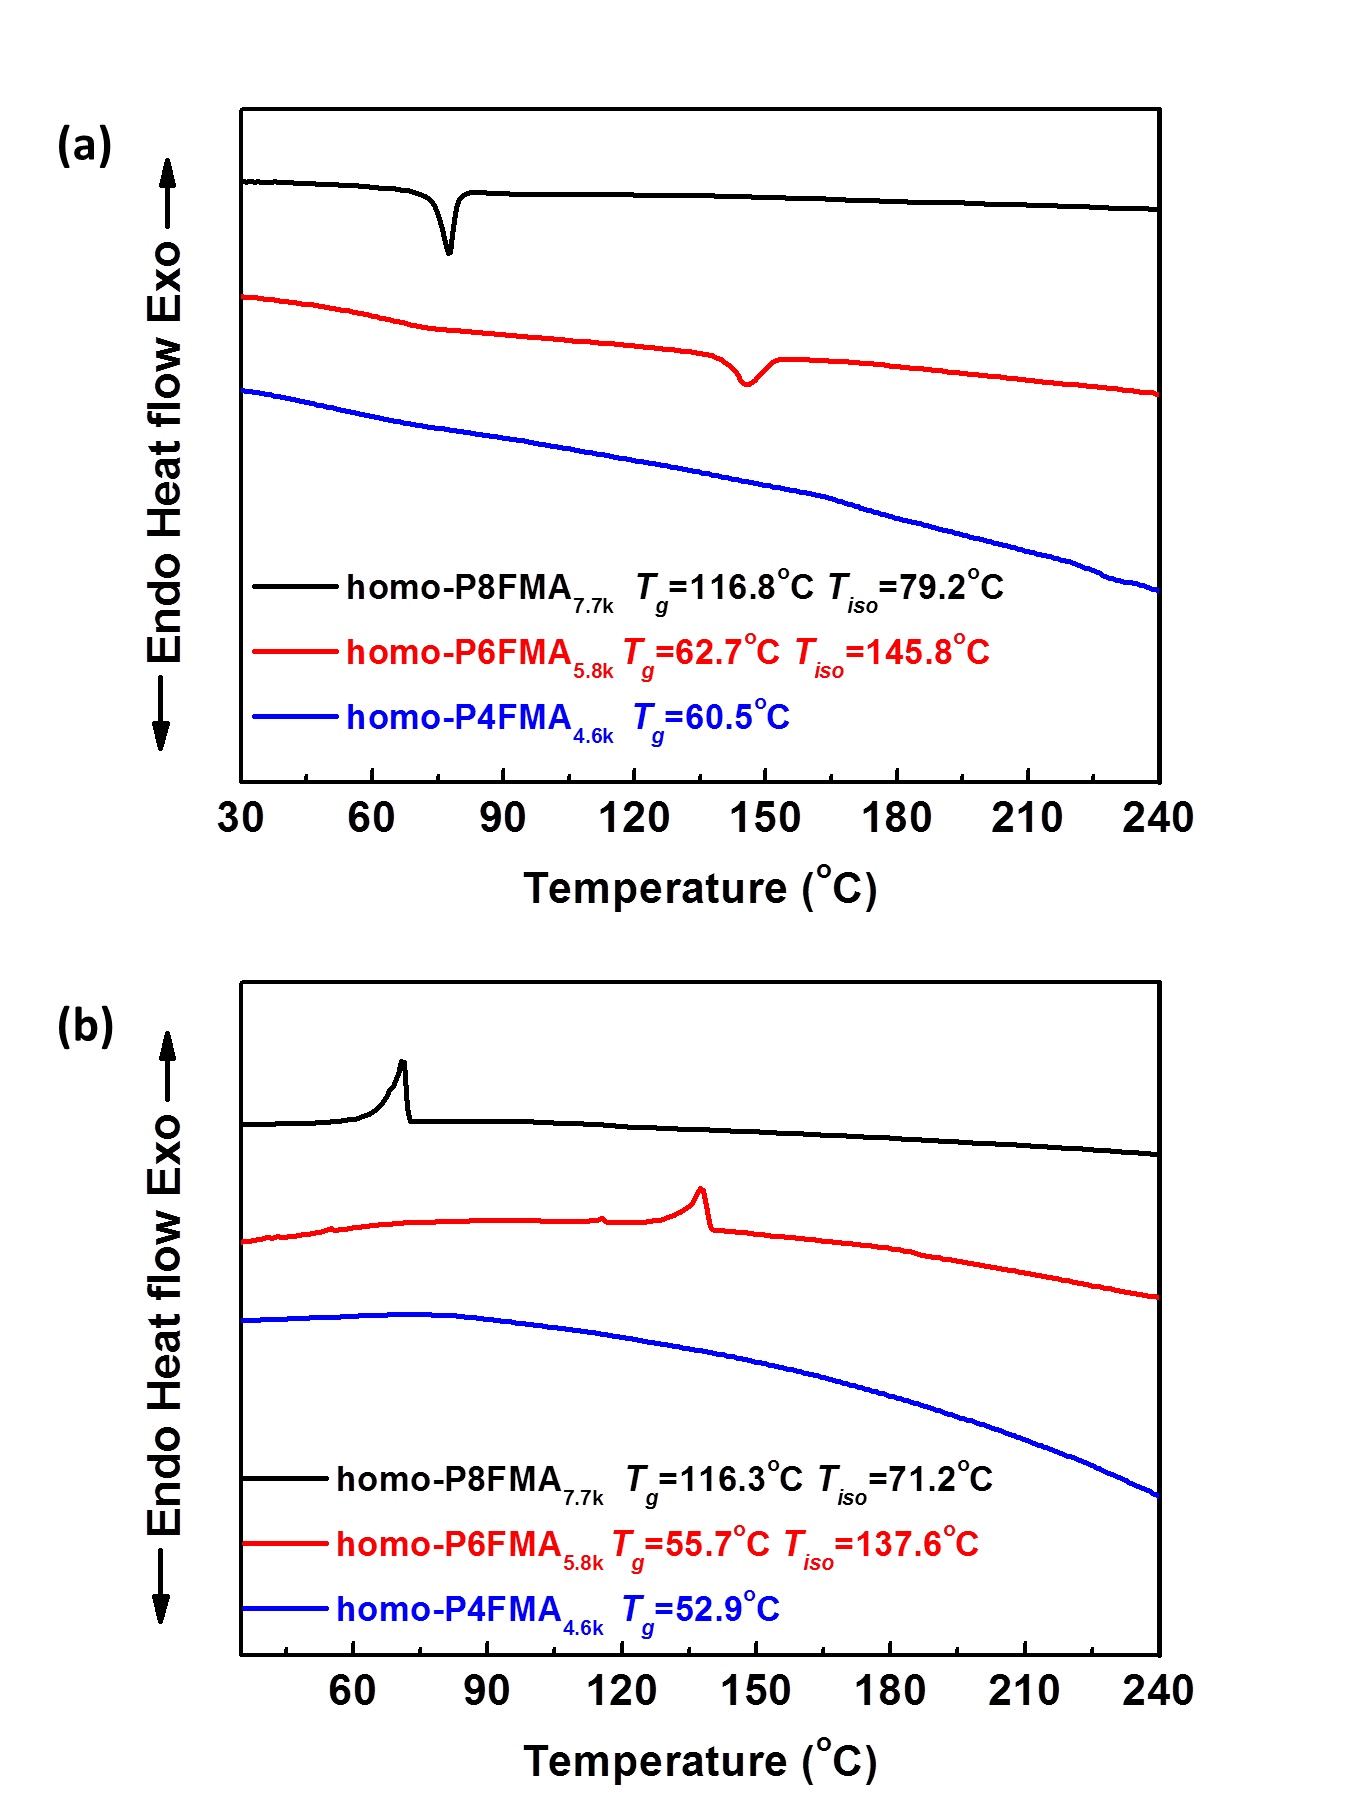


**Figure S4**. DSC curves of the synthesized homo-PXFMA (X=4, 6 and 8) at (a) a heating and a cooling rate of 10 °C/min under nitrogen atmosphere, respectively.


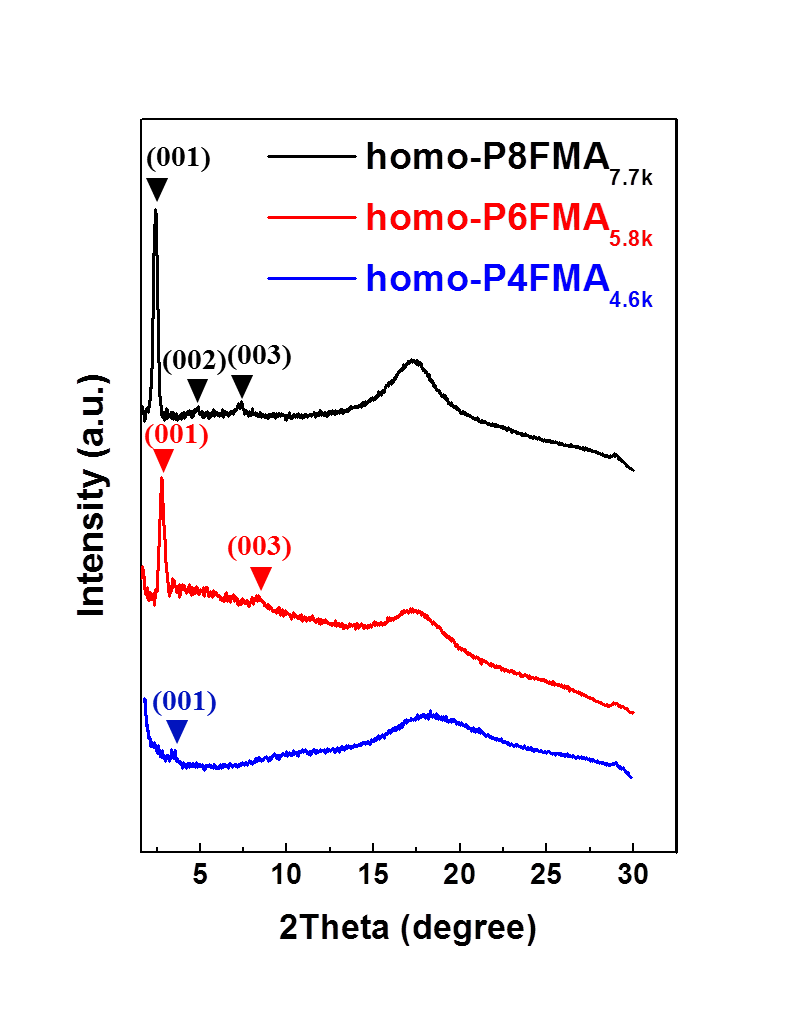


**Figure S5**. WAXD profiles of the homo-PXFMA (X=4, 6 or 8) following thermal annealing.


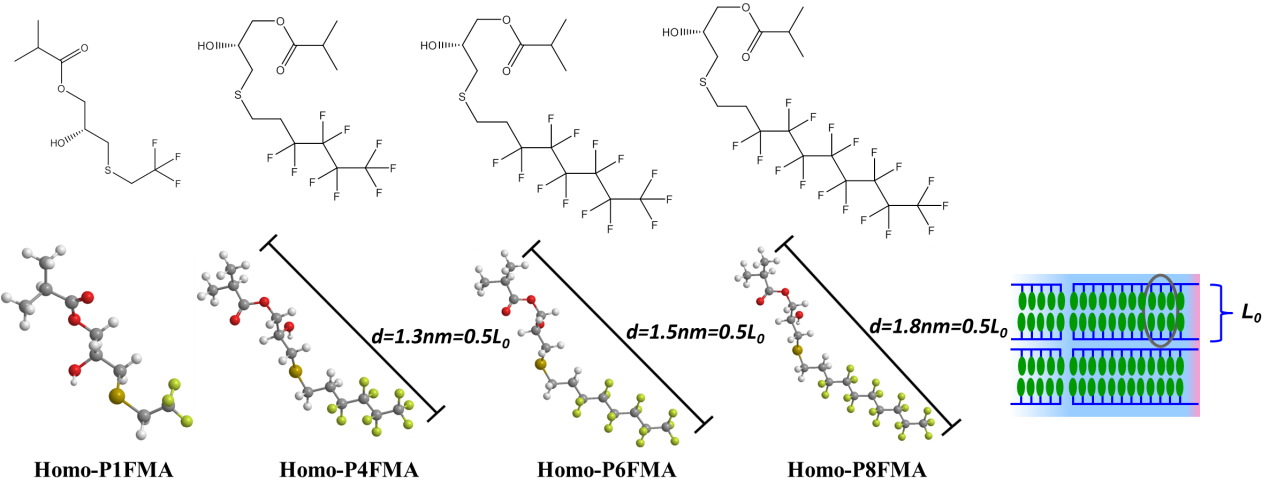


**Figure S6.** The optimized conformations of model compounds with various side chains using MM2 energy-minimization based on Chem 3D 16.0. The below right scheme represents the LC lamellar structure consisted of a pair of mesogens with end-to-end stereo-regularity.


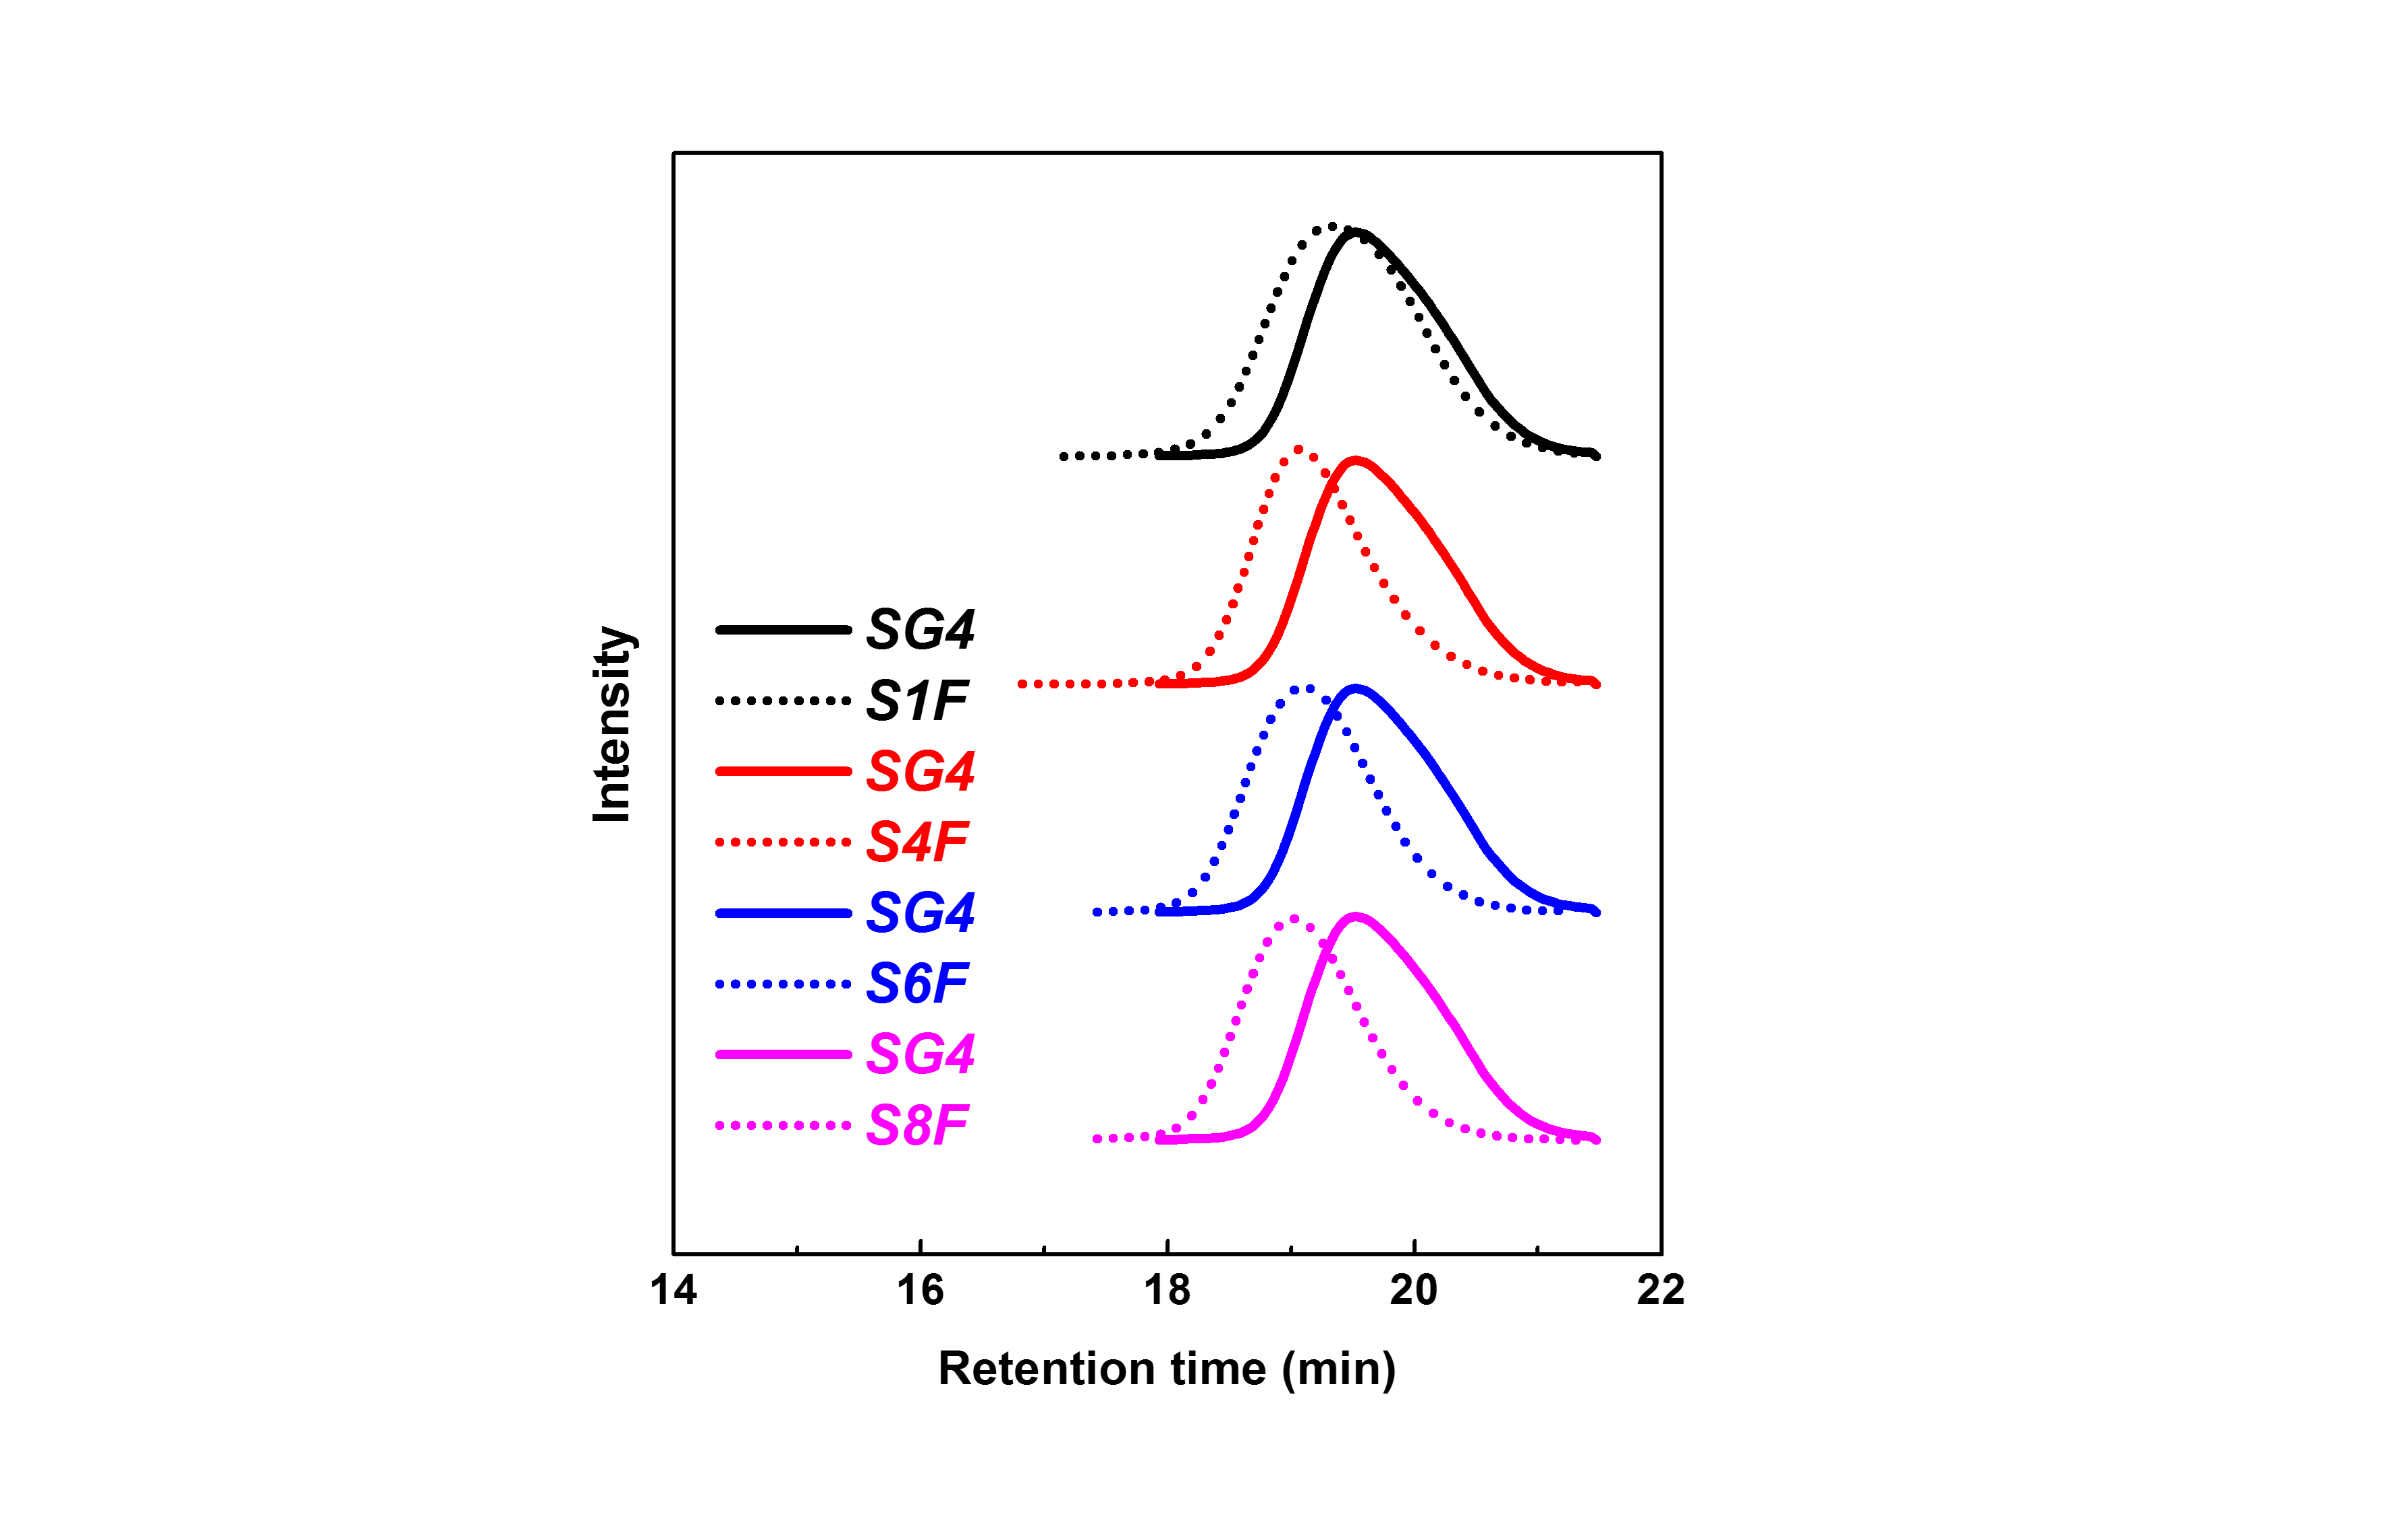


**Figure S7.** SEC chromatography of precursor PS-*b*-PGMA (SG4) and corresponding PS-*b*-PXFMA (SXF, X=1,4,6 and 8) after post functionalization.

**
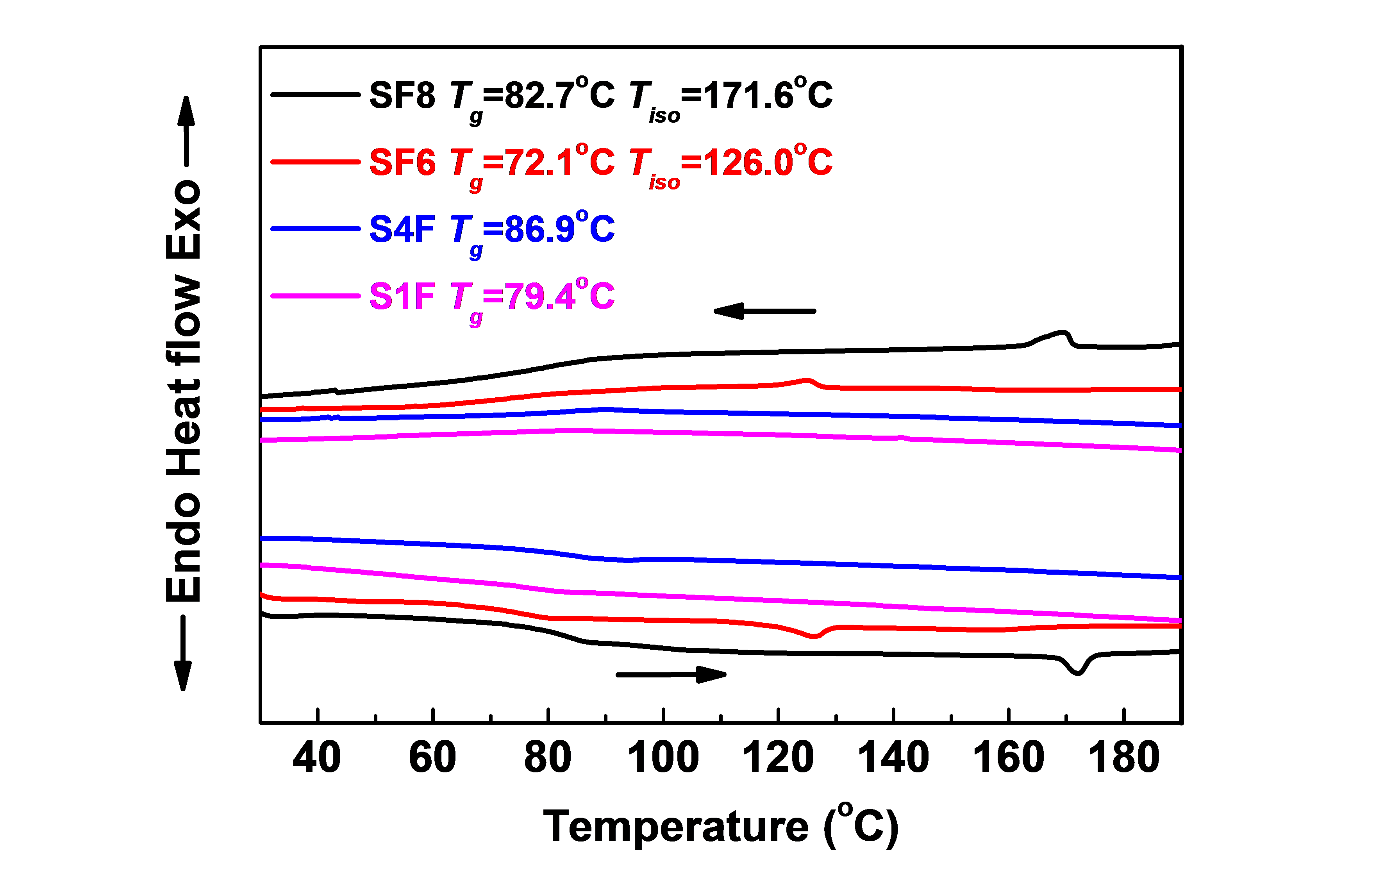
**

**Figure S8**. DSC curves of the studied PS-*b*-PXFMA (SXF, X=1,4,6 and 8) at a heating rate of 10 °C/min under nitrogen atmosphere in heating and cooling cycles. The noted transition temperatures are estimated from the heating cycles.


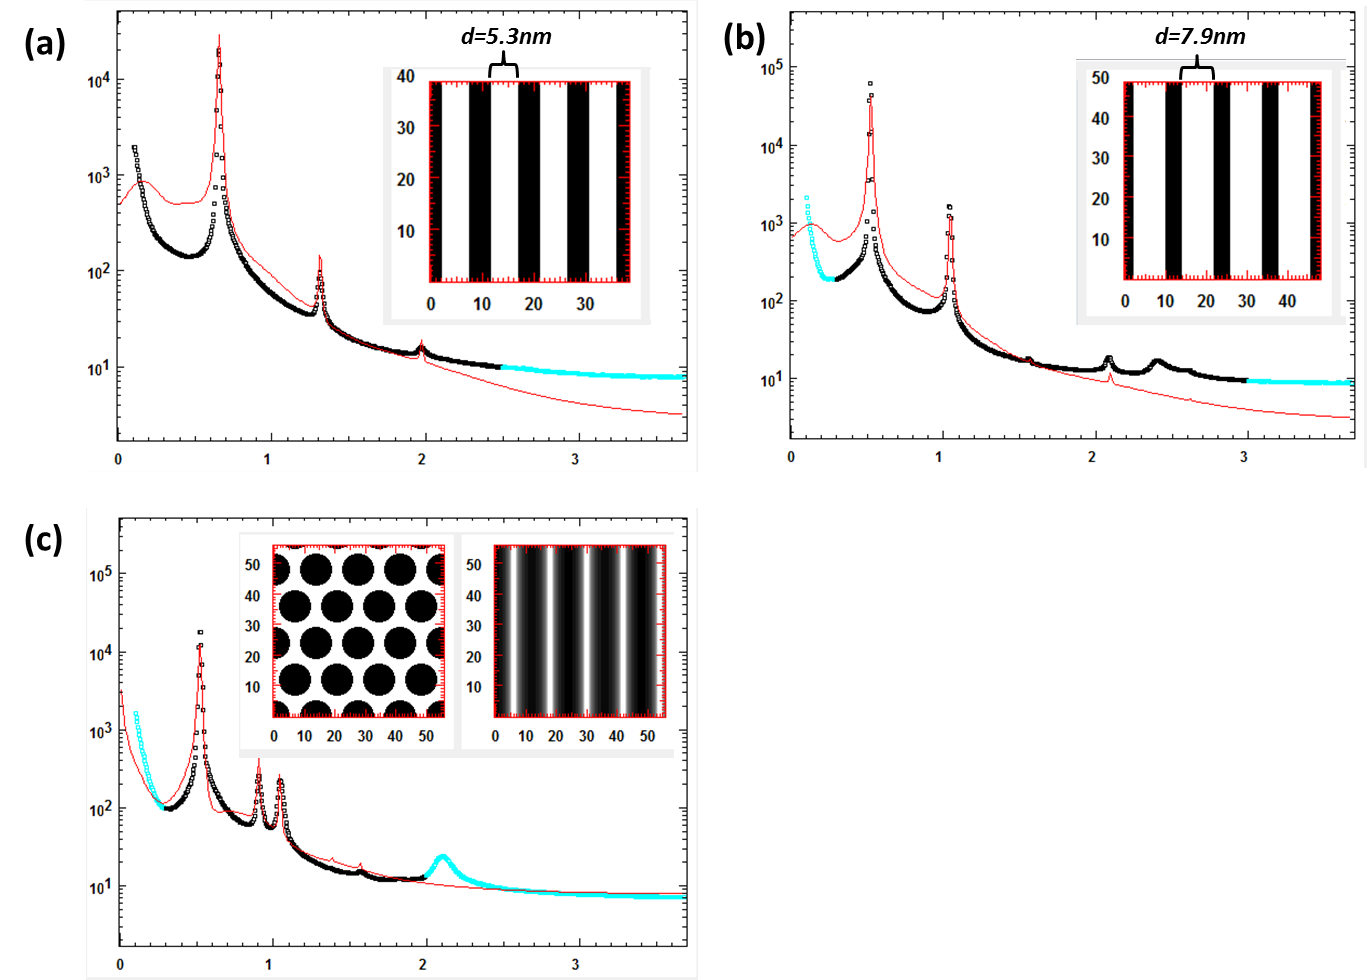


**Figure S9**. The experimental SAXS profile (black scatters) and the fitted SAXS profiles (red line) based on the model shown in the insets of (a) PS-*b*-P1FMA, (b) PS-*b*-P4FMA and (c) PS-*b*-P6FMA using Scatter (Version 2.5, 03/2011) 1D (scatter curve). The insert figure in (c) shows the hexagonally packed cylinder in top (left) and side (right) views and the red scales in nanometer units are also given in each inset.

**
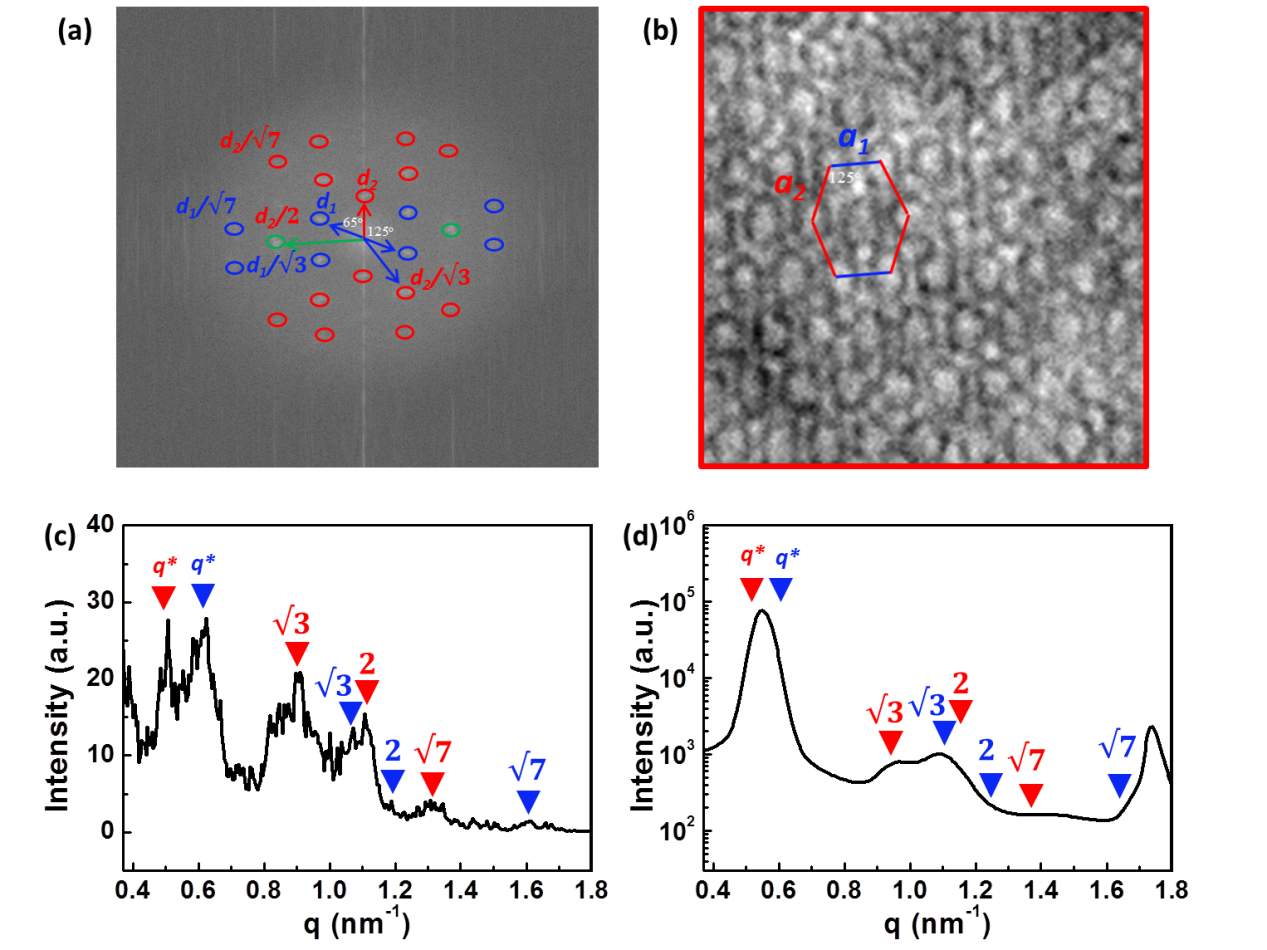
**

**Figure S10**. (a) The fast Fourier transform of P3 phase and the signals in response to *d1* and *d2*, as labeled in blue and red circle, respectively. The green circle indicates the overlapping signals from *3q* of *d1* and *2q* of *d*2. (b) The TEM images showing the dimension *a1* and *a2* in response to *d1* and *d2*, respectively, in anisotropic hexagonal packing array. (c) The 1-D integration profile of (a) along the radius to the center of image and the signals from two spacings were labeled. (d) The experimental SAXS 1-D integration profile in comparison with (c).

**
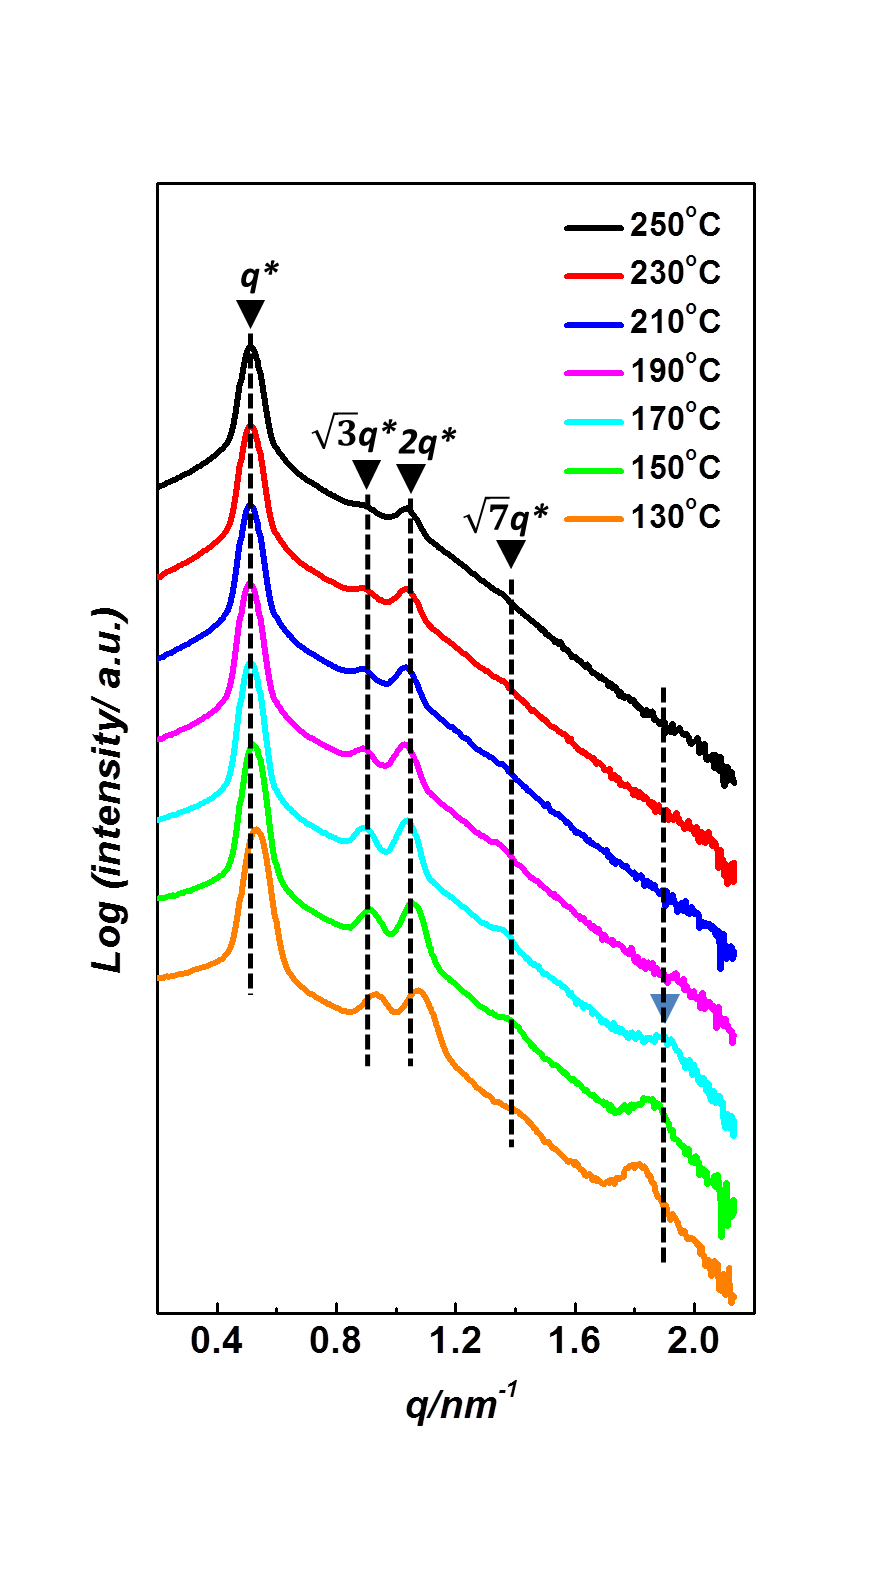
**

**Figure S11**. SAXS profiles of PS-*b*-P8FMA bulk sample taken at varied temperatures in a cooling process. The blue triangle marker indicates the scattering peak from LC side chain ordering. The estimated domain spacing of self-assembly morphology becomes smaller with reduced temperatures.

**Detailed information about the estimation of *χ*eff**

Molten BCP samples were placed in 0.01 mm thick glass tubes andthe SAXS profiles were collected at each temperature in 5 or 10 °C decrement in cooling cycles, at which the temperature was maintained for 30 min prior to the measurements to reach a thermally equilibrated state. The scattering function *I*(*q*) from the disordered melt of the BCPs with a dispersity in the molecular weight and asymmetry in the segmental volume was summarized below, where *A*0 is a fitting constant, *S*(*q*) and *W*(*q*) together are correlation functions of the BCP, *g*(*q*) is a modified Debye function and *y*(*q*) is a dimensionless wave vector, *rc* is the molar volume normalized over the degree of polymerization of the BCP, *fX* is volume fraction of *X* calculated using the bulk densities for each block (1.05 g cm−3 for PS, 1.45 g cm−3 for P4FMA, 1.66 g cm−3 for P6FMA and 1.73 g cm−3 for P8FMA, estimated from a knowledge of the structural formula of the material[[2](#_ENREF_2)]), *vX* is the molar volume of *X*. *NX* is the degree of polymerization normalized over a common reference volume (*v*0 = 118 Å3) for *X*, *FW* is the formula weight of *X*, *N*A is Avogadro’s constant, and *b*X is the segmental length of *X*. Here we assumed the dispersities for each homopolymer segment (D*X*) are equal and were estimated from the *M*w/*M*n of the BCP and weight fraction of *X* (*wX*). Four parameters, including *bX*for both polymers, *A*0 and *χ*eff, were optimized in a least-squares fit to the SAXS profiles at a certain temperature. The calculated parameters for each sample were summarized in Table S3 and S4. The estimation of *χ*eff for each sample was done at temperatures higher than the order-to-disorder transition (*TODT*).

*X* = PS or *Y* (*Y* = PXFMA X=4, 6 and 8).

**
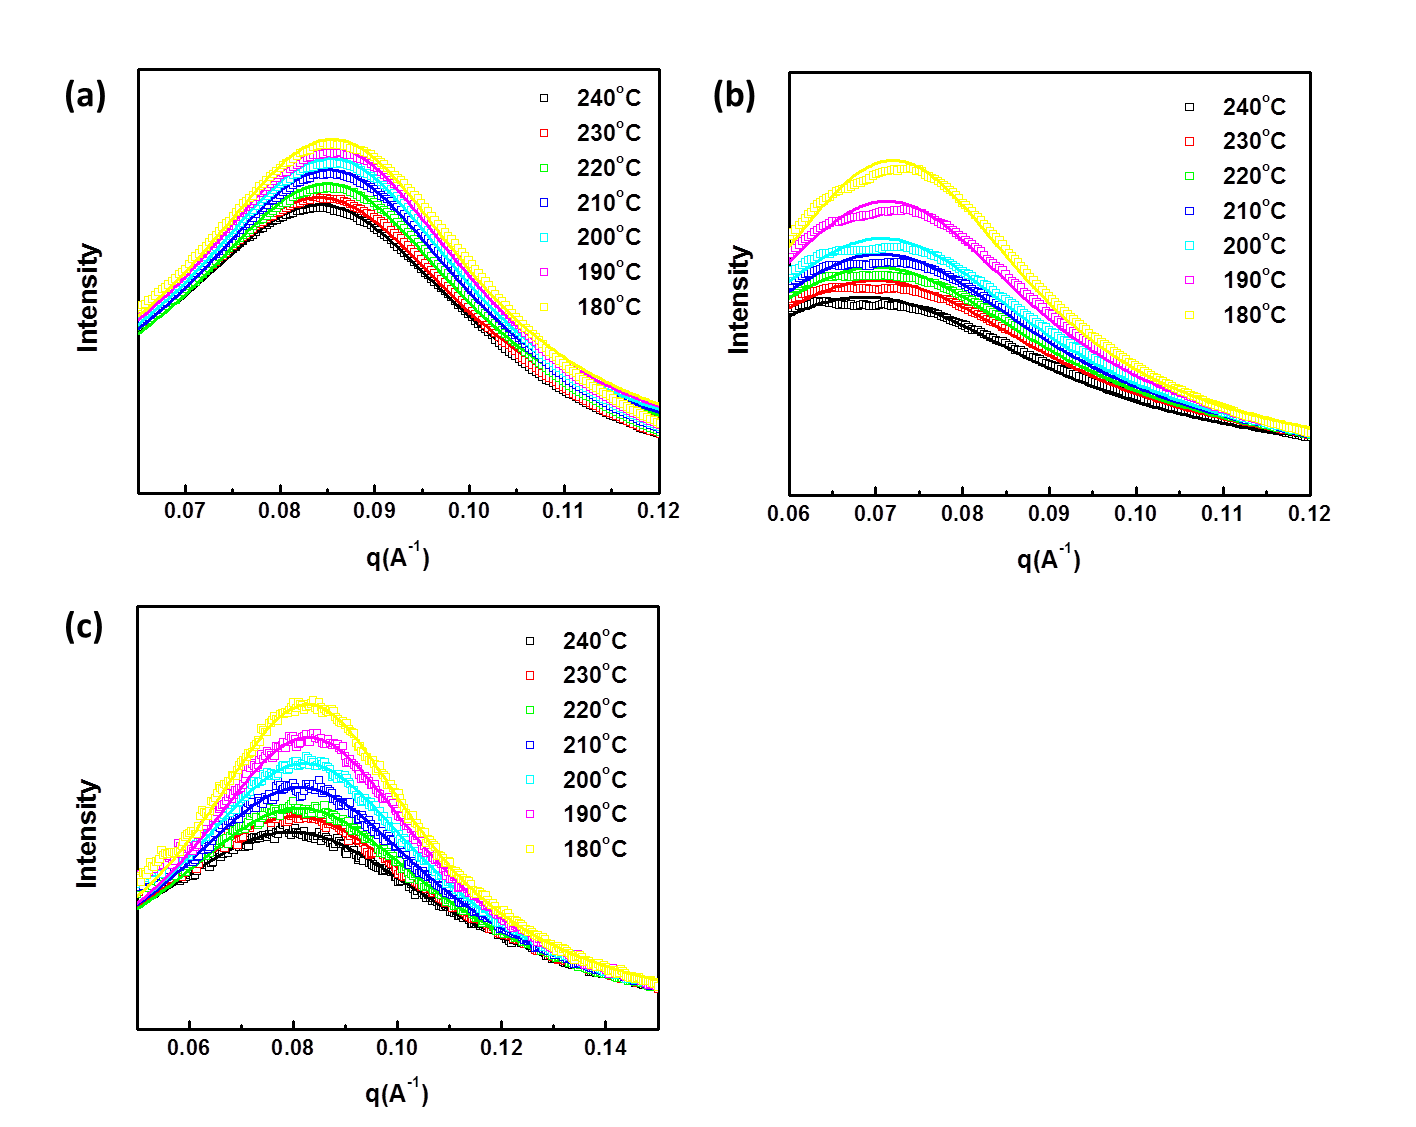
Figure S12.** The scattering profiles (dotted lines) measured by SAXS and the fitting profiles (smooth lines) at different temperatures for (a) PS-*b*-P4FMA (S4F), (b) PS-*b*-P6FMA (S6F) and (c) PS-*b*-P8FMA (S8F).


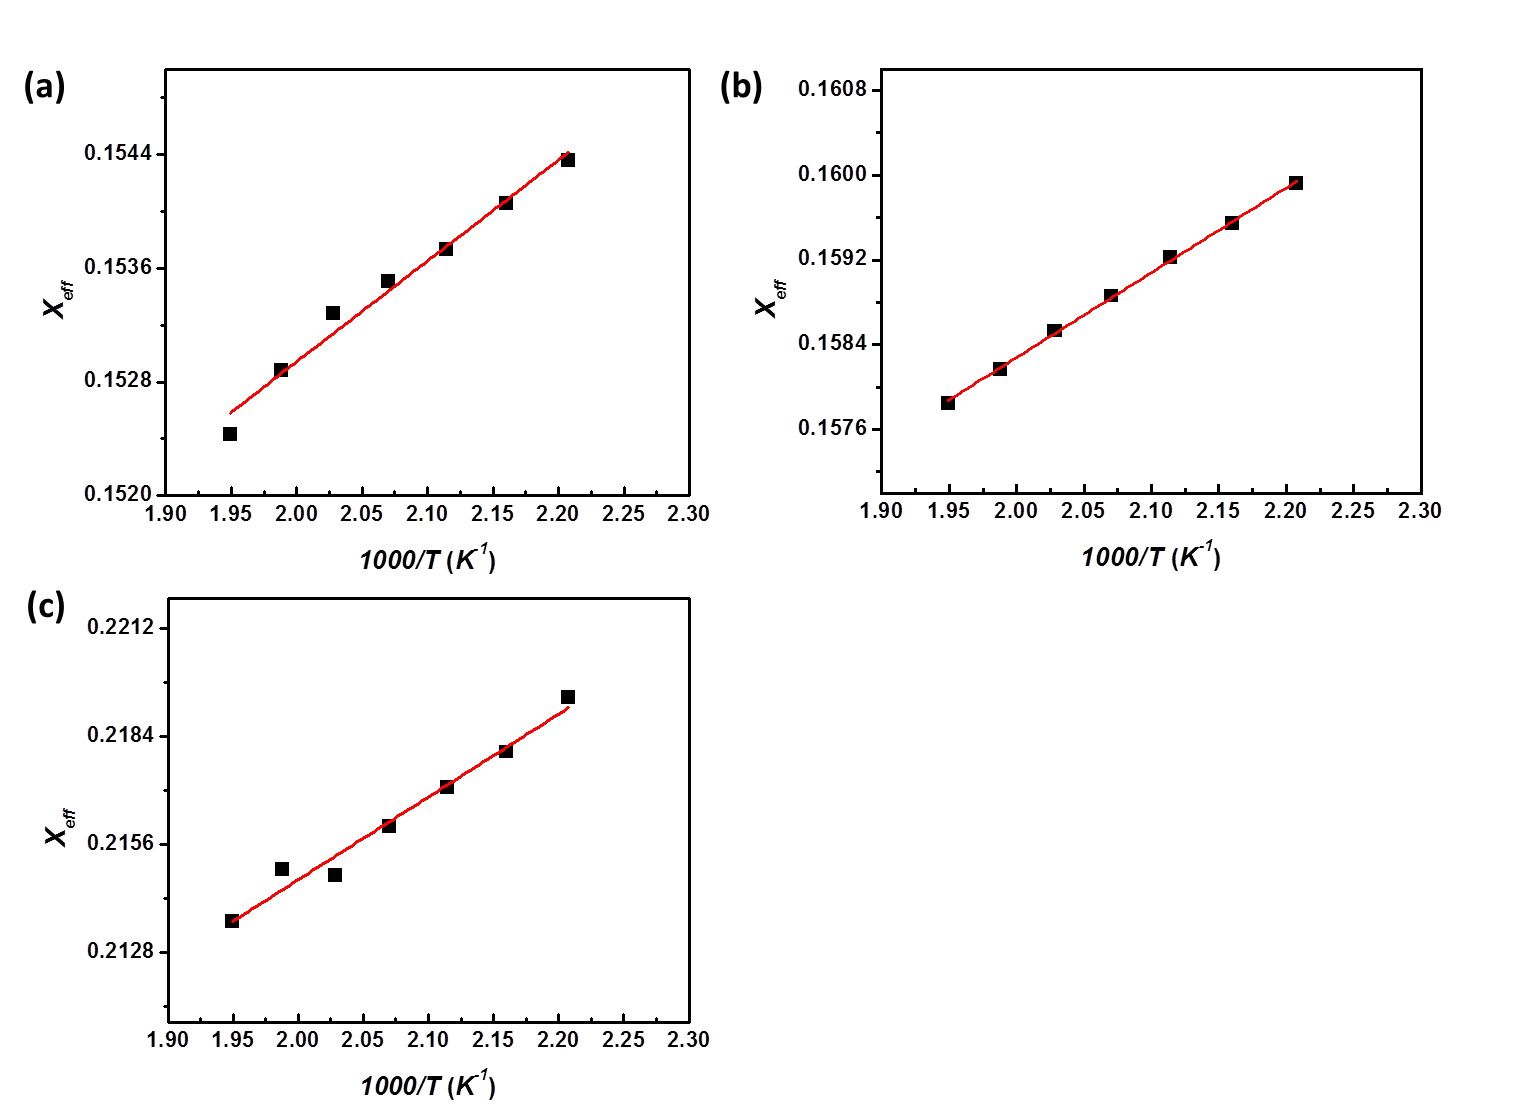


**Figure S13**. Temperature dependences of the effective Flory-Huggins interaction parameter for (a) PS-*b*-P4FMA (S4F), (b) PS-*b*-P6FMA (S6F) and (c) PS-*b*-P8FMA (S8F) using a reference volume of 118 Å3.

**Table S2.** The fixed parameters used to estimate *χ*eff for PS-*b*-PXFMA. (X=4,6 or 8)

| BCP | rc | *M*n (kg mol-1) | *M*w  (kg mol−1) | *M*n,PSa  (kg mol−1) | *f*PS | *w*PS | *Đ* |
| --- | --- | --- | --- | --- | --- | --- | --- |
| PS-*b*-P4FMA(S4F) | 32 | 2.7 | 3.8 | 1.4 | 0.60 | 0.52 | 1.39 |
| PS-*b*-P6FMA(S6F) | 43 | 3.4 | 4.4 | 1.2 | 0.47 | 0.36 | 1.27 |
| PS-*b*-P8FMA(S8F) | 39 | 3.2 | 3.9 | 1.6 | 0.62 | 0.50 | 1.18 |

a The molecular weight of *sec-*butyl from the initiator and DPE were counted as PS chain.

**Table S3.** The estimated parameters *χ*eff for PS-*b*-PXFMA at varied temperatures. (X=4,6 or 8)

| Estimated *χ*eff | | |  | |
| --- | --- | --- | --- | --- |
| *T* (°C) | PS-*b*-P4FMA (S4F) | PS-*b*-P6FMA (S6F) | | PS-*b*-P8FMA (S8F) | |
| 180 | 0.15436 | 0.15992 | | 0.21943 | |
| 190 | 0.15406 | 0.15954 | | 0.21801 | |
| 200 | 0.15373 | 0.15922 | | 0.21708 | |
| 210 | 0.15351 | 0.15886 | | 0.21607 | |
| 220 | 0.15328 | 0.15853 | | 0.21480 | |
| 230 | 0.15288 | 0.15817 | | 0.21496 | |
| 240 | 0.15243 | 0.15785 | | 0.21362 | |

**Table S4.** Estimated enthalpic and entropic contributions for PS-*b*-PXFMA. (X=4,6 or 8)

| BCP | Label | *A*/*T* | *B* |
| --- | --- | --- | --- |
| PS-*b*-P1FMAa | S1F | 19.4/*T* | 0.126 |
| PS-*b*-P4FMA | S4F | 7.1/*T* | 0.138 |
| PS-*b*-P6FMA | S6F | 8.2*T* | 0.142 |
| PS-*b*-P8FMA | S8F | 21.5/*T* | 0.172 |

a Referred from our previously published paper [[1](#_ENREF_1)].


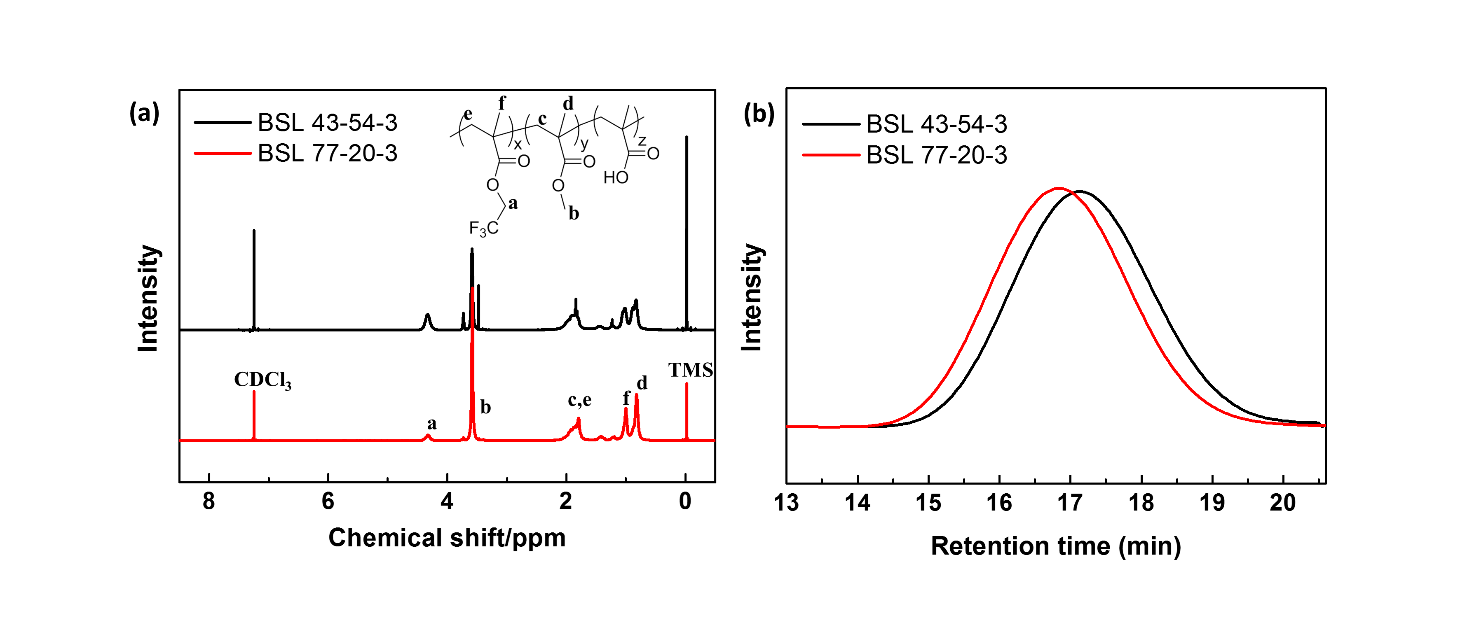


**Figure S14**. (a) 1H NMR spectra and (b) GPC chromatograms of the synthesized random copolymers PMMA-*r*-PTFEMA-*r*-PMAAs. The labeled number in XX-YY-ZZ form indicates the weight fraction of three comonomers MMA, TFEMA and MAA in percentage.

Synthesis of PMMA-*r*-PTFEMA-*r*-PMAAs

The following procedure was used for PMMA-*r*-PTFEMA-*r*-PMAA 43-54-3, but is representative of all bottom surface layer materials syntheses. The numeric label denotes the weigh fraction of each block.

2,2,2-Trifluoroethyl methacrylate (TFEMA), methyl methacrylate (MMA) and methacrylic acid (MAA) were distilled to yield clear and colorless liquid prior to use. Azobisisobutyronitrile (AIBN) was recrystallized prior to use. 2,2,2-Trifluoroethyl methacrylate (1.08g, 6.4 mmol, 0.41 eq), methyl methacrylate (0.86 g, 8.6 mmol, 0.55 eq), methacrylic acid (0.06 g, 0.7 mmol, 0.04 eq), and AIBN (0.007 g, 0.004 mmol, 0.00025 eq) were added to a 50 mL 3-neck round bottom flask equipped with a stir bar and rubber septa. The reagents were dissolved in THF (7.5 mL) and the solution was deoxygenated by vigorously bubbling nitrogen through the solution for 30 minutes. The reaction vessel, under positive nitrogen pressure, was immersed in an oil bath at 70 ˚C. The reaction was heated and stirred for 24 h and quenched at 0 °C. The viscous liquid was precipitated into methanol (300 mL) and filtered. The resulting polymer was dissolved in THF and reprecipitated into methanol for two additional times. The polymer was dried in vacuo overnight at 40 °C and the white powder product (93% yield) was obtained.

1H NMR (400 MHz, chloroform*-d,* δ, ppm): 0.84-0.89, 1.01-1.11, 1.21-1.26, 1.40-1.48, 1.76-2.08, 3.49-3.70, 4.20-4.45.

**Table S5.** Characteristics of the synthesized BSL copolymers.

| Random Copolymer | Weight Compositiona | | | Volume Compositionb | | | *M*n | *Đ* |
| --- | --- | --- | --- | --- | --- | --- | --- | --- |
| TFEMA | MMA | MAA | TFEMA | MMA | MAA |
| 20 | 77 | 3 | 16 | 81 | 3 | 32700 | 1.77 |
| 54 | 43 | 3 | 50 | 47 | 3 | 31900 | 1.81 |

a MMA and TFEMA compositions were determined by 1H NMR and MAA composition was estimated from monomer feeding ratio. b Volume Composition was determined using bulk densities for each unit (1.47 g cm−3 for PTFEMA[[3](#_ENREF_3)], 1.18 g cm−3 for PMMA[[4](#_ENREF_4)], 1.29 g cm−3 for PMAA[[5](#_ENREF_5)]).

**Estimating the surface free energies of the homopolymers**

The surface free energies (SFEs) of the homopolymers were calculated by measuring the water and diiodomethane contact angles (C.A.) of the homopolymer thin films. The thin films were prepared by spin-coating a 1-2 wt.% THF or toluene solution on bare silicon wafers at 3000 rpm for 30 s to obtain thin films with thicknesses of 40-50 nm. These thin films were annealed at 120 °C for 10 min before the C.A. measurements.

**Table S6**. Contact angles and surface free energies (SFEs) of homopolymers.

| Homopolymer | C.A.(H2O)a (o) | C.A.(CH2I2)a (o) | SFEb (mJ m-2) |
| --- | --- | --- | --- |
| P4FMA | 82.11.5 | 75.51.6 | 25.7 |
| P6FMA | 86.31.3 | 77.81.9 | 23.1 |
| P8FMA | 89.01.1 | 80.51.5 | 21.6 |
| PSc | 90.50.8 | -d | -d |

a Average values of measurements taken at 5 positions. b Calculated by the Owens-Wendt method. c The C.A. measurement for PS used a homopolymer with *Mn*=34.6 kg mol-1 and Ð=1.09, prepared through anionic polymerization. d The SFE of PS could not be obtained as PS was partially soluble in diiodomethane.


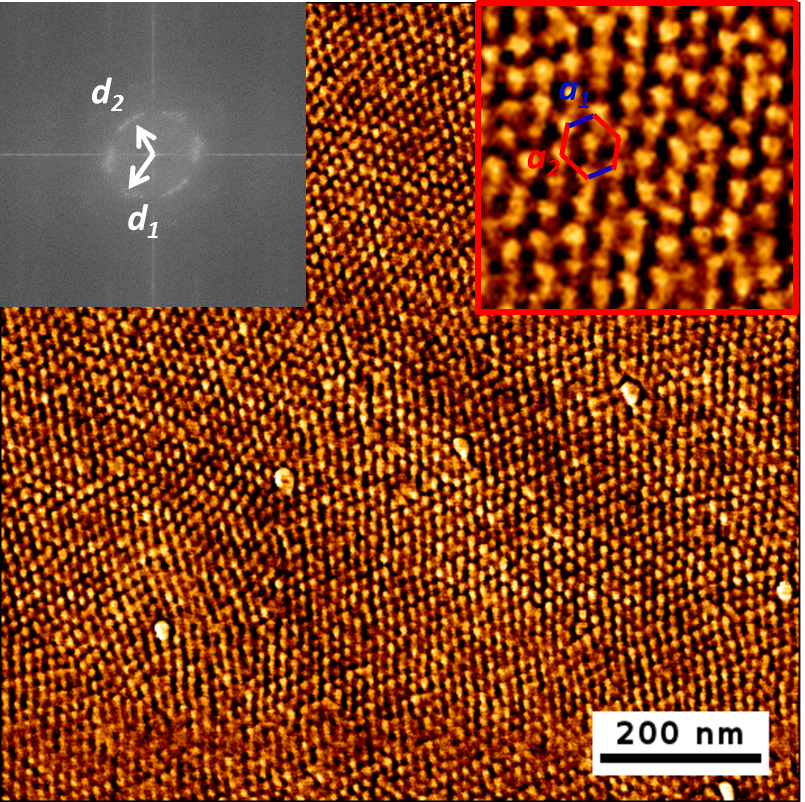


**Figure S15**. The AFM phase image of the thin film prepared from PS-*b*-P8FMA on BSL (43-54-3) following oxygen plasma etching. The inset reveals the fast Fourier transform of the image and the signals in response to *d1* and *d2*are marked. The inset magnified AFM images shows the dimension *a1* (blue marker) and *a2* (red marker) in response to *d1* and *d2*, respectively, in anisotropic hexagonal packing array.

**Reference**

1. Y. Yoshimura, A. Chandra, Y. Nabae and T. Hayakawa, "Chemically tailored high-chi block copolymers for perpendicular lamellae via thermal annealing," *Soft Matter*, vol. 15, no. 17, pp. 3497-3506, 2019.

2. R. F. Fedors, "A method for estimating both the solubility parameters and molar volumes of liquids," *Polymer Engineering & Science*, vol. 14, no. 2, pp. 147-154, 1974.

3. B. Akpinar, L. A. Fielding, V. J. Cunningham, Y. Ning, O. O. Mykhaylyk, P. W. Fowler and S. P. Armes, "Determining the Effective Density and Stabilizer Layer Thickness of Sterically Stabilized Nanoparticles," *Macromolecules*, vol. 49, no. 14, pp. 5160-5171, 2016.

4. K. Aouachria and N. Belhaneche-Bensemra, "Miscibility of PVC/PMMA blends by vicat softening temperature, viscometry, DSC and FTIR analysis," *Polymer Testing*, vol. 25, no. 8, pp. 1101-1108, 2006.

5. B. C. Ho, W. K. Chin and Y. D. Lee, "Solubility Parameters of Polymethacrylonitrile, Poly(Methacrylic Acid) and Methacrylonitrile Methacrylic-Acid Copolymer," *Journal of Applied Polymer Science*, vol. 42, no. 1, pp. 99-106, 1991.
